# Supplementary material for: Treatment approach and outcomes of patients with accelerated/blast-phase myeloproliferative neoplasms in the current era
Source: PubMed Central journal article supplement — Blood Adv. 2024 May 15;8(13):3468–77. doi: 10.1182/bloodadvances.2024012880 (PMC11260843; doi:10.1182/bloodadvances.2024012880), 2024-05-15
Supplement: BLOODA_ADV-2024-012880-mmc1.pdf [file BLOODA_ADV-2024-012880-mmc1.pdf]

**Supplemental Table 1: Specific treatment approaches in first-line treatment of MPN-AP/BP**

| Therapy Type                    | Specific Regimen (n)                                                                                                                  |
|---------------------------------|---------------------------------------------------------------------------------------------------------------------------------------|
| <b>Intensive Chemo (n=65)</b>   | 7+3 based (23)<br>FLAG based (17)<br>FLAG + Idarubicin (15)<br>CPX-351 (5)<br>HIDAC + Mitoxantrone (3)<br>MEC (1)<br>CLAG-M (1)       |
| <b>DNMTi based (n=65)</b>       | DNMTi monotherapy (43)<br>DNMTi + JAK inhibitor (19)<br>DNMTi + IDH inhibitor (3)                                                     |
| <b>DNMTi + VEN based (n=54)</b> | DNMTi + VEN (50)<br>DNMTi + VEN + JAK inhibitor (3)<br>DNMTi + VEN + investigational agent (1)                                        |
| <b>Other (n=6)</b>              | JAK inhibitor monotherapy (2)<br>Cladribine + LDAC + JAK inhibitor (2)<br>LDAC + VEN (1)<br>JAK inhibitor + investigational agent (1) |

FLAG = fludarabine + cytarabine + granulocyte colony stimulating factor; HIDAC = high-dose cytarabine; MEC = mitoxantrone + etoposide + cytarabine; CLAG-M = cladribine + cytarabine + granulocyte colony stimulating factor + mitoxantrone; DNMTi = DNA methyltransferase inhibitor; JAK = Janus kinase; IDH = isocitrate dehydrogenase; VEN = venetoclax; LDAC = low-dose cytarabine

**Supplemental Table 2: Specific treatment approaches in second-line and beyond treatment of MPN-AP/BP**

| Therapy Type | Specific Regimen (n) |
|--------------|----------------------|
|--------------|----------------------|

|                                    |                                                                                                                                                                                                                                           |
|------------------------------------|-------------------------------------------------------------------------------------------------------------------------------------------------------------------------------------------------------------------------------------------|
| <b>DNMTi + VEN based (n=38)</b>    | DNMTi + VEN (34)<br>DNMTi + VEN + investigational agent (3)<br>DNMTi + VEN + IDH inhibitor (1)                                                                                                                                            |
| <b>Intensive Chemo (n=37)</b>      | HIDAC + Mitoxantrone (6)<br>FLAG based (6)<br>7+3 based (5)<br>CLAG-M based (5)<br>MEC based (4)<br>HIDAC (3)<br>CPX-351 (2)<br>Mitoxantrone + Etoposide (2)<br>Clofarabine based (2)<br>FLAG + Mitoxantrone (1)<br>FLAG + Idarubicin (1) |
| <b>DNMTi based (n=16)</b>          | DNMTi monotherapy (13)<br>DNMTi + JAK inhibitor (1)<br>DNMTi + FLT3 inhibitor (1)<br>DNMTi + investigational agent (1)                                                                                                                    |
| <b>Targeted monotherapy (n=11)</b> | IDH inhibitor (9)<br>FLT3 inhibitor (2)                                                                                                                                                                                                   |
| <b>Other (n=13)</b>                | Investigational agent (8)<br>LDAC + VEN (3)<br>JAK inhibitor (1)<br>Lenalidomide (1)                                                                                                                                                      |

FLAG = fludarabine + cytarabine + granulocyte colony stimulating factor; HIDAC = high-dose cytarabine; MEC = mitoxantrone + etoposide + cytarabine; CLAG-M = cladribine + cytarabine + granulocyte colony stimulating factor + mitoxantrone; DNMTi = DNA methyltransferase inhibitor; JAK = Janus kinase; IDH = isocitrate dehydrogenase; VEN = venetoclax; LDAC = low-dose cytarabine; FLT3 = FMS-like tyrosine kinase 3

**Supplemental Table 3:** Patient demographics and disease characteristics during chronic-phase MPN and at diagnosis of MPN-AP/BP in patients that received allo-HCT

| <b>Demographics Table</b>                  | <b>N=65</b> |
|--------------------------------------------|-------------|
| Age at chronic phase MPN diagnosis, median | 58.6        |

|                                                                  |             |
|------------------------------------------------------------------|-------------|
| Female, n (%)                                                    | 22 (33.8)   |
| <b>Race/Ethnicity, n (%) (n=48)</b>                              |             |
| White Race                                                       | 47 (97.9)   |
| Black Race                                                       | 1 (2.1)     |
| Asian Race                                                       | 0 (0.0)     |
| Other Race                                                       | 0 (0.0)     |
| Hispanic Ethnicity                                               | 4 (8.3)     |
| <b>Chronic-Phase MPN</b>                                         |             |
| Polycythemia vera                                                | 10 (15.9)   |
| Essential thrombocythemia                                        | 22 (34.9)   |
| Primary myelofibrosis                                            | 18 (28.6)   |
| MPN-not otherwise specified/Other                                | 13 (20.6)   |
| <b>Chronic-Phase MPN driver mutation</b>                         | <b>N=65</b> |
| <i>JAK2</i>                                                      | 38 (58.5)   |
| <i>CALR</i>                                                      | 15 (23.1)   |
| <i>MPL</i>                                                       | 7 (10.8)    |
| Triple Negative                                                  | 5 (7.7)     |
| <b>Therapies Received for chronic-phase MPN, n (%)</b>           | <b>N=65</b> |
| Hydroxyurea                                                      | 36 (55.4)   |
| JAK inhibitor                                                    | 19 (29.2)   |
| Interferon                                                       | 5 (7.7)     |
| DNMTi                                                            | 3 (4.6)     |
| <b>MPN-AP/BP Characteristics</b>                                 |             |
| Age at MPN-AP/BP diagnosis, median                               | 65.0        |
| Latency between chronic-phase MPN and MPN-AP/BP in years, median | 6.2         |
| <b>2017 ELN Risk</b>                                             |             |
| Favorable                                                        | 1 (1.6)     |
| Intermediate                                                     | 22 (35.5)   |
| High                                                             | 39 (62.9)   |
| <b>Clinical Features at MPN-AP/BP Diagnosis</b>                  |             |
| WBC ( $10^3/\mu\text{L}$ ), median                               | 6.4         |
| Hemoglobin (g/dL), median                                        | 9.4         |
| Platelet Count ( $10^3/\mu\text{L}$ ), median                    | 141.0       |
| Peripheral Blast %, median                                       | 12.0        |
| Marrow Blast %, median                                           | 22.0        |
| Creatinine g/dL, median                                          | 0.9         |
| Total Bilirubin g/dL, median                                     | 0.7         |
| Splenomegaly, n (%)                                              | 36 (56.3)   |

MPN = myeloproliferative neoplasm; AP/BP = accelerated/blast phase; JAK = Janus Kinase; DNMTi = DNA methyltransferase inhibitor; allo-HCT = allogeneic hematopoietic stem cell transplant; WBC = white blood count; ELN = European LeukemiaNet

**Supplemental Table 4A:** Univariate Analyses, Odds ratio for receipt of allo-HCT in patients with accelerated/blast phase MPN

| Variable      | Odds Ratio (95% CI)  | p-value |
|---------------|----------------------|---------|
| Age $\geq$ 65 | 0.327 (0.175, 0.611) | 0.0005  |

|                                       |                       |       |
|---------------------------------------|-----------------------|-------|
| WBC > 25 x 10 <sup>3</sup> /μL        | 0.257 (0.113, 0.584)  | 0.001 |
| Platelet > 100 x 10 <sup>3</sup> /μL  | 1.844 (1.012, 3.361)  | 0.046 |
| Hemoglobin > 10g/dL vs < 8g/dL        | 3.694 (1.629, 8.376)  | 0.002 |
| Hemoglobin 8-10 g/dL vs < 8g/dL       | 1.564 (0.753, 3.247)  | 0.51  |
| Peripheral blasts ≥ 20% vs < 10%      | 0.595 (0.280, 1.266)  | 0.18  |
| Peripheral blasts 10-19% vs < 10%     | 1.382 (0.673, 2.838)  | 0.38  |
| Marrow blasts ≥ 20% vs <10%           | 3.078 (0.656, 14.444) | 0.15  |
| Marrow blasts 10-19% vs <10%          | 4.285 (0.862, 21.290) | 0.08  |
| Total bilirubin (g/dL)                | 0.964 (0.493, 1.889)  | 0.92  |
| Creatinine (g/dL)                     | 0.279 (0.100, 0.780)  | 0.015 |
| Splenomegaly                          | 1.286 (0.705, 2.343)  | 0.41  |
| <b>Driver Mutation Status</b>         |                       |       |
| <i>JAK2</i>                           | 0.835 (0.457, 1.525)  | 0.56  |
| <i>CALR</i>                           | 2.159 (1.019, 4.575)  | 0.045 |
| <i>MPL</i>                            | 1.151 (0.436, 3.036)  | 0.78  |
| Triple negative                       | 0.392 (0.142, 1.081)  | 0.07  |
| <b>ELN risk</b>                       |                       |       |
| High-risk vs intermediate / favorable | 0.780 (0.412, 1.474)  | 0.44  |
| <b>Mutation Status</b>                |                       |       |
| <i>TP53</i>                           | 0.573 (0.263, 1.249)  | 0.16  |
| <i>IDH1</i>                           | 1.820 (0.534, 6.197)  | 0.34  |
| <i>IDH2</i>                           | 0.518 (0.184, 1.454)  | 0.21  |
| <i>ASXL1</i>                          | 0.811 (0.407, 1.615)  | 0.55  |
| <i>EZH2</i>                           | 1.059 (0.347, 3.234)  | 0.92  |
| <i>SRSF2</i>                          | 0.677 (0.308, 1.490)  | 0.33  |
| <i>RUNX1</i>                          | 1.598 (0.713, 3.581)  | 0.25  |
| <b>Frontline Treatment</b>            |                       |       |
| IC                                    | 1.705 (0.907, 3.207)  | 0.10  |
| DNMTi + VEN based                     | 0.769 (0.387, 1.527)  | 0.45  |
| DNMTi based                           | 0.730 (0.380, 1.402)  | 0.34  |
| <b>Chronic-phase MPN type</b>         |                       |       |
| ET vs other                           | 1.399 (0.597, 3.278)  | 0.068 |
| PMF vs other                          | 0.706 (0.299, 1.671)  | 0.35  |
| PV vs other                           | 0.641 (0.241, 1.709)  | 0.27  |

**Supplemental Table 4B:** Multivariate model results, Odds ratio for receipt of allo-HCT in patients with accelerated/blast phase MPN

| Variable                       | Odds Ratio (95% CI)  | p-value |
|--------------------------------|----------------------|---------|
| Age ≥ 65                       | 0.365 (0.185, 0.720) | 0.004   |
| WBC > 25 x 10 <sup>3</sup> /μL | 0.219 (0.091, 0.527) | 0.0007  |

|                                 |                       |       |
|---------------------------------|-----------------------|-------|
| Hemoglobin > 10g/dL vs < 8g/dL  | 4.218 (1.742, 10.213) | 0.005 |
| Hemoglobin 8-10 g/dL vs < 8g/dL | 2.076 (0.947, 4.552)  | 0.97  |
| <i>CALR</i> mutation status     | 2.017 (0.878, 4.635)  | 0.10  |

MPN = myeloproliferative neoplasm; AP/BP = accelerated/blast phase; WBC = white blood count; ELN = European LeukemiaNet; IC = intensive chemotherapy; DNMTi = DNA methyltransferase inhibitor; VEN = venetoclax; ET = essential thrombocythemia; PMF = primary myelofibrosis; PV = polycythemia vera

**Supplemental Table 5A:** Univariate analyses of factors impacting overall survival from time of allo-HCT in patients with MPN-AP/BP

| Variable                              | Hazard ratio (95% CI) | p-value |
|---------------------------------------|-----------------------|---------|
| Age ≥ 65                              | 1.983 (0.995, 3.950)  | 0.052   |
| WBC > 25 x 10 <sup>3</sup> /μL        | 1.329 (0.462, 3.819)  | 0.60    |
| Platelet > 100 x 10 <sup>3</sup> /μL  | 0.877 (0.447, 1.720)  | 0.70    |
| Hemoglobin > 10g/dL vs < 8g/dL        | 0.209 (0.086, 0.507)  | 0.0005  |
| Hemoglobin 8-10 g/dL vs < 8g/dL       | 0.272 (0.119, 0.623)  | 0.002   |
| Peripheral blasts ≥ 20% vs < 10%      | 0.776 (0.316, 1.903)  | 0.58    |
| Peripheral blasts 10-19% vs < 10%     | 1.035 (0.484, 2.212)  | 0.93    |
| Marrow blasts ≥ 20% vs <10%           | 0.154 (0.033, 0.713)  | 0.017   |
| Marrow blasts 10-19% vs <10%          | 0.189 (0.039, 0.909)  | 0.038   |
| Total bilirubin (g/dL)                | 0.821 (0.427, 1.577)  | 0.55    |
| Creatinine (g/dL)                     | 0.213 (0.034, 1.341)  | 0.10    |
| Splenomegaly                          | 1.538 (0.758, 3.121)  | 0.23    |
| <b>Driver Mutation Status</b>         |                       |         |
| <i>JAK2</i>                           | 0.746 (0.378, 1.470)  | 0.40    |
| <i>CALR</i>                           | 2.003 (0.953, 4.211)  | 0.07    |
| <i>MPL</i>                            | 2.324 (0.806, 6.701)  | 0.12    |
| Triple negative                       | 0.223 (0.030, 1.633)  | 0.14    |
| <b>2017 ELN risk</b>                  |                       |         |
| High-risk vs intermediate / favorable | 1.924 (0.912, 4.057)  | 0.09    |
| <b>Mutation Status</b>                |                       |         |
| <i>TP53</i>                           | 3.601 (1.664, 7.793)  | 0.001   |
| <i>IDH1</i>                           | 0.992 (0.302, 3.262)  | 0.99    |
| <i>IDH2</i>                           | 0.246 (0.034, 1.797)  | 0.17    |
| <i>ASXL1</i>                          | 0.994 (0.449, 2.203)  | 0.99    |
| <i>EZH2</i>                           | 1.425 (0.501, 4.050)  | 0.51    |
| <i>SRSF2</i>                          | 0.715 (0.252, 2.027)  | 0.53    |
| <i>RUNX1</i>                          | 0.870 (0.360, 2.099)  | 0.76    |
| <b>Conditioning regimen</b>           |                       |         |

|                                           |                       |       |
|-------------------------------------------|-----------------------|-------|
| Myeloablative vs Reduced Intensity        | 0.946 (0.429, 2.085)  | 0.89  |
| <b>Donor source</b>                       |                       |       |
| Cord vs mismatched unrelated              | 0.000 (NA,NA)         | 0.99  |
| Haploidentical vs mismatched unrelated    | 4.155 (0.888, 19.438) | 0.07  |
| Matched related vs mismatched unrelated   | 1.145 (0.230, 5.7000) | 0.87  |
| Matched unrelated vs mismatched unrelated | 1.059 (0.242, 4.632)  | 0.94  |
| <b>GVHD development</b>                   |                       |       |
| Acute GVHD                                | 0.741 (0.368, 1.493)  | 0.40  |
| Chronic GVHD                              | 0.388 (0.160, 0.939)  | 0.036 |
| <b>Chronic-phase MPN type</b>             |                       |       |
| ET vs other                               | 1.301 (0.499, 3.391)  | 0.59  |
| PMF vs other                              | 1.180 (0.419, 3.323)  | 0.75  |
| PV vs other                               | 1.182 (0.376, 3.709)  | 0.77  |

**Supplemental Table 5B:** Multivariate model of factors impacting overall survival from time of allo-HCT in patients with MPN-AP/BP

| <b>Variable</b>              | <b>Hazard ratio (95% CI)</b> | <b>p-value</b> |
|------------------------------|------------------------------|----------------|
| Age ≥ 65                     | 3.989 (1.514, 10.508)        | 0.0051         |
| Marrow blasts ≥ 20% vs <10%  | 2.512 (0.816, 7.735)         | 0.11           |
| Marrow blasts 10-19% vs <10% | 3.197 (1.127, 9.066)         | 0.03           |
| Creatinine (g/dL)            | 0.062 (0.006, 0.690)         | 0.02           |
| <i>TP53</i> mutation status  | 3.015 (1.121, 8.106)         | 0.03           |

Allo-HCT = allogeneic hematopoietic stem cell transplant; MPN = myeloproliferative neoplasm; AP/BP = accelerated/blast phase; WBC = white blood count; ELN = European LeukemiaNet; GVHD = graft versus host disease; ET = essential thrombocythemia; PMF = primary myelofibrosis; PV = polycythemia vera
